## RESEARCH ARTICLE

# Life on the edge: O<sub>2</sub> binding in Atlantic cod red blood cells near their southern distribution limit is not sensitive to temperature or haemoglobin genotype

Samantha L. Barlow<sup>1,\*</sup>, Julian Metcalfe<sup>2</sup>, David A. Rughton<sup>2</sup> and Michael Berenbrink<sup>1,\*</sup>

## ABSTRACT

Atlantic cod are a commercially important species believed to be threatened by warming seas near their southern, equatorward upper thermal edge of distribution. Limitations to circulatory O<sub>2</sub> transport, in particular cardiac output, and the geographic distribution of functionally different haemoglobin (Hb) genotypes have separately been suggested to play a role in setting thermal tolerance in this species. The present study assessed the thermal sensitivity of O<sub>2</sub> binding in Atlantic cod red blood cells with different Hb genotypes near their upper thermal distribution limit and modelled its consequences for the arterio-venous O<sub>2</sub> saturation difference, Sa–vO<sub>2</sub>, another major determinant of circulatory O<sub>2</sub> supply rate. The results showed statistically indistinguishable red blood cell O<sub>2</sub> binding between the three HbI genotypes in wild-caught Atlantic cod from the Irish Sea (53° N). Red blood cells had an unusually low O<sub>2</sub> affinity, with reduced or even reversed thermal sensitivity between pH 7.4 and 7.9, and 5.0 and 20.0°C. This was paired with strongly pH-dependent affinity and cooperativity of red blood cell O<sub>2</sub> binding (Bohr and Root effects). Modelling of Sa–vO<sub>2</sub> at physiological pH, temperature and O<sub>2</sub> partial pressures revealed a substantial capacity for increases in Sa–vO<sub>2</sub> to meet rising tissue O<sub>2</sub> demands at 5.0 and 12.5°C, but not at 20°C. Furthermore, there was no evidence for an increase of maximal Sa–vO<sub>2</sub> with temperature. It is suggested that Atlantic cod at such high temperatures may solely depend on increases in cardiac output and blood O<sub>2</sub> capacity, or thermal acclimatisation of metabolic rate, for matching circulatory O<sub>2</sub> supply to tissue demand.

**KEY WORDS:** Climate change, *Gadus morhua*, Oxygen transport, O<sub>2</sub> affinity, Thermal tolerance, Bohr effect

## INTRODUCTION

The 5th assessment report of the Intergovernmental Panel on Climate Change documents an increase in average global sea surface temperatures over the last century and predicts their continued rise (IPCC, 2014). The body temperature of marine ectothermic organisms is directly affected by warming seas, which makes an understanding of their physiological capabilities

to withstand elevated temperatures vital for predicting future redistributions of species and influencing management regimes (e.g. Deutsch et al., 2015).

Atlantic cod (*Gadus morhua*) are widely distributed in coastal and shelf seas throughout the North Atlantic, but stocks near the southern, equatorward upper thermal margin of their historic distribution limit in the Irish and southern North Sea have declined over the past decades, which has in part been ascribed to warming seas (Brander, 2005; Drinkwater, 2005; Perry et al., 2005; Beggs et al., 2014; Deutsch et al., 2015). Given, in addition, the high commercial importance of cod and the resulting fishing pressures, this has led to extensive research into thermal effects on Atlantic cod life history traits, physiology, behaviour, abundance and distribution (Mork et al., 1984; Petersen and Steffensen, 2003; Gamperl et al., 2009; Rughton et al., 2010; Behrens et al., 2012; Engelhard et al., 2014; Kreiss et al., 2015; Rutterford et al., 2015). Based on the thermal sensitivity of life history traits and projected future temperature changes, Atlantic cod stocks near their current upper thermal distribution limit in the north-east Atlantic have been predicted to disappear entirely from the Celtic and Irish Seas by the end of this century (Drinkwater, 2005). Likewise, alternative mechanistic models based on a metabolic index of the O<sub>2</sub> supply to demand ratio and projected future temperature and O<sub>2</sub> partial pressure ( $P_{O_2}$ ) changes predict reductions in the current habitat volume (occupied area × depth range) by 12–32% at the equatorward upper thermal margin of Atlantic cod by the end of the present century (Deutsch et al., 2015).

The oxygen- and capacity-limited thermal tolerance (OCLTT) hypothesis attempts to provide a general mechanistic explanation for the thermal distribution limits of aquatic organisms, suggesting that the capacity of O<sub>2</sub> supply mechanisms in aquatic ectotherms, such as the circulatory and ventilatory systems, becomes insufficient to meet rising O<sub>2</sub> demands at thermal extremes, thus affecting their ability to maintain an adequate aerobic scope for activities such as feeding, digestion, growth, migration, reproduction and predator evasion (Pörtner, 2001; Pörtner and Knust, 2007).

Studies on the acute thermal tolerance of Atlantic cod have identified the circulatory system as a primary limiting factor in the O<sub>2</sub> supply cascade from the environment to the tissues, with cardiac function suggested to become compromised close to the critical thermal maximum (Sartoris et al., 2003; Lannig et al., 2004; Gollock et al., 2006). According to the Fick equation, cardiac output,  $\dot{Q}$  (the product of heart rate,  $f_H$ , and stroke volume,  $V_S$ ) and the arterio-venous O<sub>2</sub> difference,  $Ca_{O_2} - Cv_{O_2}$ , together determine the rate of circulatory O<sub>2</sub> delivery ( $\dot{M}_{O_2}$ ) between respiratory organs and tissues (Fick, 1870):

$$\dot{M}_{O_2} = \dot{Q}(Ca_{O_2} - Cv_{O_2}). \quad (1)$$

The contribution of changes in  $Ca_{O_2} - Cv_{O_2}$  in the assessment of maximal O<sub>2</sub> supply capacities during warming of marine

<sup>1</sup>Department of Evolution, Ecology and Behaviour, Institute of Integrative Biology, The University of Liverpool, Biosciences Building, Crown Street, Liverpool L69 7ZB, UK. <sup>2</sup>Centre for Environment, Fisheries and Aquaculture Science (CEFAS), Lowestoft NR33 0HT, UK.

\*Authors for correspondence (sbarlow168@gmail.com; michaelb@liverpool.ac.uk)

 M.B., 0000-0002-0793-1313

This is an Open Access article distributed under the terms of the Creative Commons Attribution License (<http://creativecommons.org/licenses/by/3.0>), which permits unrestricted use, distribution and reproduction in any medium provided that the original work is properly attributed.

ectotherms is largely unknown, although it has long been recognised that in humans, for example, the increase in  $\dot{C}a_{O_2} - \dot{C}v_{O_2}$  may surpass the increase in  $\dot{Q}$  in its contribution to meeting elevated  $\dot{M}O_2$  during heavy exercise (factorial increases of 3.45 and 2.51, respectively; Ekelund and Holmgren, 1964; Dejours, 1975).  $\dot{C}a_{O_2} - \dot{C}v_{O_2}$  essentially equals the maximal blood  $O_2$  binding capacity multiplied by the arterio-venous  $O_2$  saturation difference,  $Sa - v_{O_2}$  [ignoring the relatively small contribution of physically dissolved  $O_2$  in blood with average haemoglobin (Hb) concentration].  $Sa - v_{O_2}$  is in turn determined by the arterial and mixed venous  $P_{O_2}$  values ( $P_{aO_2}$  and  $P_{vO_2}$ , respectively) and the shape and properties of the blood  $O_2$  equilibrium curve (OEC; e.g. Weber and Campbell, 2011). In fact, right-shifts of the OEC with increasing temperature or decreasing pH have classically been linked to improved rates of tissue  $O_2$  supply (Bohr et al., 1904; Barcroft and King, 1909). Yet, the contribution of such OEC changes to meeting increased  $O_2$  demands in marine ectotherms at elevated temperatures is poorly known.

Atlantic cod are of particular interest in this context because the different Hb phenotypes of their polymorphic major HbI component (Sick, 1961) have been associated with differences in the thermal sensitivity of  $O_2$  binding in red blood cells (RBCs) (Karpov and Novikov, 1980; Andersen et al., 2009). The frequencies of the two co-dominant alleles underpinning the HbI polymorphism vary inversely along a latitudinal cline in the north-east Atlantic, from the Barents Sea with frequencies of the HbI 1 allele as low as 0–0.1, to the southern North Sea, where HbI 1 frequency rises as high as 0.6–0.7 (Sick, 1965; Jamieson and Birley, 1989; Andersen et al., 2009; Ross et al., 2013). These clines have been attributed to natural selection acting on divergent temperature sensitivities of Atlantic cod harbouring the different HbI genotypes regarding growth, physiology and behaviour (reviewed by Andersen, 2012; Ross et al., 2013). However, the brief but influential report by Karpov and Novikov (1980) that first suggested functional differences in RBC  $O_2$  affinity between the HbI genotypes was based on RBC OECs of White Sea Atlantic cod (67° N) near their northern, lower thermal distribution limit and measured at a single, physiologically rather low pH value (7.5; Karpov and Novikov, 1980). Its findings and extrapolations for the efficiency of RBC  $O_2$  transport in Atlantic cod HbI genotypes near their southern, upper thermal limit of distribution have, to our knowledge, never been experimentally verified.

The present study was undertaken to assess the thermal sensitivity of RBC  $O_2$  binding, and its consequences for  $Sa - v_{O_2}$  under *in vivo*-relevant conditions in Atlantic cod HbI genotypes near their upper thermal distribution limit in the north-east Atlantic. The results showed statistically indistinguishable RBC  $O_2$  affinities and pH and temperature sensitivities between all three HbI genotypes in wild-caught Atlantic cod from the Irish Sea (53° N). All animals showed an unusually low RBC  $O_2$  affinity, with no – or even reversed – thermal sensitivity over much of the physiological pH and temperature range. This was paired with strongly pH-dependent affinity and cooperativity of RBC  $O_2$  binding. Modelling of  $Sa - v_{O_2}$  at physiological values for pH, temperature and  $\dot{P}O_2$  revealed a substantial capacity for increases in this factor to meet rising tissue  $O_2$  demands at 5.0 and 12.5°C, but not at 20°C, where further increases in the maximal rate of  $O_2$  delivery by the circulatory system are predicted to solely rely on increases in cardiac output and  $O_2$  capacity.

## MATERIALS AND METHODS

Wild Atlantic cod, *Gadus morhua* Linnaeus 1758, with a total length of 46.4±0.45 cm (here and elsewhere: mean±s.e.m.;  $N=106$

animals) were caught by hook and line on board commercial fishing boats in the Mersey Estuary adjoining the Irish Sea near Liverpool, UK (53°25' N, 3.02°1' E), between mid-January and the end of February 2015 at sea surface temperatures between 6.8 and 7.9°C. Animals were killed by a British Home Office approved Schedule 1 method, involving concussion and destruction of the brain. Blood was removed from caudal vessels using heparinised 1 ml syringes, with the dead space filled with 9.000 U ml<sup>-1</sup> sodium heparin solution (from porcine intestinal mucosa, Sigma-Aldrich). Up to eight animals of undetermined sex were bled on the day before each experiment and samples were kept on ice for a maximum of 10 h before landing and genotyping. Immediately after, blood of a single individual was selected for experiments the next day in accordance with a pre-determined random selection of genotype order.

## Genotype determination

RBCs were isolated from plasma and buffy coat by centrifugation (3000 rcf, 4°C, 4 min) and 20 µl of RBC pellet was lysed by adding 64 µl cold distilled water. Hbs in the haemolysate were separated by horizontal agarose gel electrophoresis, modified from Sick (1961). A 1% agar gel was prepared in diluted (1:1, with water) Smithies buffer (45 mmol l<sup>-1</sup> Tris, 25 mmol l<sup>-1</sup> boric acid and 1 mmol l<sup>-1</sup> EDTA, adjusted to pH 8.8 at room temperature). Undiluted Smithies buffer was used as an electrode buffer and samples were run towards the positive pole at 120 V for 40 min at 4°C in a cold room, whereupon Hb bands were viewed immediately without staining.

## Preparation of RBC suspensions

The remaining RBC pellets of selected samples were resuspended in physiological saline (mmol l<sup>-1</sup>: NaCl 125.5, KCl 3, MgCl<sub>2</sub> 1.5, CaCl<sub>2</sub> 1.5, D-glucose 5 and Hepes 20, adjusted to pH 7.97 at 15°C; Koldkjaer and Berenbrink, 2007). The above washing procedure of centrifugation and resuspension in fresh saline was repeated twice and during the last step RBCs were resuspended at an approximate haematocrit (Hct) of 5–10% and stored overnight at 4°C in a 15 ml Falcon tube with a large air reservoir, placed on the side to maximise exchange surface area between saline and sedimented cells. Following the overnight rest and immediately prior to establishing RBC OECs, RBCs were washed again, resuspended in fresh saline at 8–13% Hct, and the concentrations of tetrameric Hb (Hb<sub>4</sub>), ATP and GTP, and mean corpuscular Hb concentration (MCHC) were determined.

## Analytical procedures

[Hb<sub>4</sub>] was determined by the cyan-methaemoglobin method using modified Drabkin's solution (11.9 mmol l<sup>-1</sup> NaHCO<sub>3</sub>, 0.61 mmol l<sup>-1</sup> K<sub>3</sub>[Fe(CN)<sub>6</sub>] and 0.77 mmol l<sup>-1</sup> KCN) and a haem-based extinction coefficient of 11.0 l mmol<sup>-1</sup> cm<sup>-1</sup> at a wavelength of 540 nm, as described earlier (Völkel and Berenbrink, 2000). Hct was measured in micro-haematocrit tubes using a SpinCrit Micro-Hematocrit centrifuge and MCHC was calculated as [Hb<sub>4</sub>]/(Hct/100). For ATP and GTP concentration determination, equal volumes of washed RBC suspension and 0.6 mmol l<sup>-1</sup> perchloric acid (PCA) were mixed before freezing at -80°C for later analysis. Samples were defrosted and centrifuged at 4°C and 13,000 rcf. The PCA extract was neutralised to an approximate pH of 7 by the addition of concentrated potassium carbonate to the supernatant and the resulting precipitate was removed by centrifugation. ATP and GTP concentrations in the supernatant were then determined enzymatically via the two-step process outlined by Albers et al. (1983), with the following modifications: the enzymes hexokinase with glucose 6-phosphate dehydrogenase

(H8629, Sigma-Aldrich) and nucleoside 5'-diphosphate kinase (N0379, Sigma-Aldrich) were used at concentrations of 13 and 5000 U ml<sup>-1</sup>, respectively. The accuracy of the test and potential losses of nucleotide triphosphates (NTPs) during PCA extractions were examined using ATP and GTP standard solutions (A2383 and G8877, Sigma-Aldrich). Recovery was 96.4±0.9% and 80.4±0.64% (*N*=18) for ATP and GTP, respectively, and all measurements were corrected accordingly. Concentrations were converted to mmol l<sup>-1</sup> RBCs using the equation presented by Albers et al. (1983), then standardised using MCHC and are presented as ATP/Hb<sub>4</sub> and GTP/Hb<sub>4</sub> molar ratios.

### OEC determinations

After the above measurements were taken, RBC suspensions were further diluted 10-fold in pH 7.97 saline and then pH was varied by final 10-fold dilutions in saline of pH 7.45, 7.70 and 7.97 (all adjusted at 15°C). Thermally induced saline pH changes were assessed in air-equilibrated RBC suspensions using a Lazar Model FTPH-2S pH electrode with a Jenco 6230N meter (Jenco Collaborative, CA, USA). Given the buffering properties of the saline (20 mmol l<sup>-1</sup> Hepes) and small quantity of cells (0.08–0.13% Hct), oxygenation-linked changes in pH of RBC suspensions during OEC measurements were deemed negligible. For each individual, 1.2 ml aliquots of final RBC suspension were incubated, at the three pH values in parallel, in 50 ml capacity Eschweiler glass tonometers (Eschweiler GmbH, Engelsdorf, Germany) with custom-attached 1 cm path length optical glass cuvettes (following a design by Brix et al., 1998). This was performed at temperatures of 5.0, 12.5 and 20.0°C and a minimum of five *P*<sub>O<sub>2</sub></sub> values covering the range 20–80% RBC O<sub>2</sub> saturation. *P*<sub>O<sub>2</sub></sub> was varied by mixing air and N<sub>2</sub> in pre-determined ratios using a Wösthoff gas mixing pump (Wösthoff GmbH, Bochum, Germany) and the final gas mixture was fully humidified at the experimental temperature. RBC suspensions were equilibrated for at least 20 min with each gas mixture. Solutions remained sealed within the tonometer to ensure *P*<sub>O<sub>2</sub></sub> stayed constant while an optical spectrum was taken between 500 and 700 nm (Uvicam UV 500 spectrophotometer, Thermo Electron Corporation, OH, USA; with Vision 32 software) and O<sub>2</sub> saturation of RBC suspensions was determined by spectral deconvolution (Völkel and Berenbrink, 2000).

### Data analysis and statistics

Spectral deconvolution of the optical spectra (see Völkel and Berenbrink, 2000) was used to determine the concentrations of Hb derivatives within RBC suspensions (oxyhaemoglobin, HbO<sub>2</sub>; deoxyhaemoglobin, deoxyHb; and the two forms of methaemoglobin, acid Hb<sup>+</sup> and alkaline Hb<sup>+</sup>) at each temperature, pH and *P*<sub>O<sub>2</sub></sub> value using SigmaPlot 12.5 (Systat Software Inc., San Jose, CA, USA). The unknown concentrations (mmol l<sup>-1</sup>) of the different tetrameric Hb derivatives were calculated using:

$$f = au + bv + cw + dx, \quad (2)$$

where *a*, *b*, *c* and *d* represent [HbO<sub>2</sub>], [deoxyHb], [acid Hb<sup>+</sup>] and [alkaline Hb<sup>+</sup>], respectively, and were restricted to values greater than or equal to zero; *f* is the predicted dependent variable to be fitted to the measured absorption data for each nm step between 500 and 700 nm; and *u*, *v*, *w* and *x* represent the respective experimentally determined absorption coefficients for each Hb derivative at each wavelength between 500 and 700 nm, respectively. Absorption coefficients for HbO<sub>2</sub> and deoxyHb were created with RBC suspensions in pH 8.05 saline at 5.0°C, exposed

to 100% oxygen or 100% nitrogen. Acid Hb<sup>+</sup> and alkaline Hb<sup>+</sup> absorption coefficients were constructed using Hb suspensions oxidised with tri-potassium hexacyanoferrat at pH 6.5 and 8.05, respectively, although the analysis showed that no methaemoglobin formation had occurred in any of our samples. In all cases, the predicted values by the curve-fitting procedure were plotted for each wavelength between 500 and 700 nm together with the measured spectra for visual inspection of the accuracy of the prediction.

The level of RBC O<sub>2</sub> saturation (*S*) was calculated as [HbO<sub>2</sub>]/([HbO<sub>2</sub>]+[deoxyHb]). Hill plots on data between 20% and 80% saturation were created using log[*S*/(1-*S*)] versus log*P*<sub>O<sub>2</sub></sub>. log*P*<sub>50</sub> was calculated by linear regression as the log*P*<sub>O<sub>2</sub></sub> when log[*S*/(1-*S*)] equalled 0. The slope of the regression line indicated the apparent cooperativity of RBC O<sub>2</sub> binding or Hill number (*n*<sub>H</sub>). The Bohr coefficient was calculated by Φ=Δlog*P*<sub>50</sub>/ΔpH for each pH interval. Because of non-linearity, at each temperature, log*P*<sub>50</sub> and *n*<sub>H</sub> were plotted against measured saline pH and 2nd order polynomials were used to standardise them to pH 7.40, 7.65 and 7.9, removing the effect of temperature-induced pH shifts on these variables. Once standardised to fixed pH, thermal sensitivities of OECs were expressed as apparent heat of oxygenation, Δ*H'*. These were calculated using the van't Hoff equation Δ*H'*=2.303*R* [Δlog*P*<sub>50</sub>/(Δ1/*T*)], where *R* is the universal gas constant (0.008314 kJ K<sup>-1</sup> mol<sup>-1</sup>) and *T* is temperature in K.

OECs for a series of fixed pH values were produced using values for *n*<sub>H</sub> and *P*<sub>50</sub> predicted at a given pH for each individual from the same 2nd order polynomial equations used above for standardising log*P*<sub>50</sub> and *n*<sub>H</sub>. RBC O<sub>2</sub> saturation *S* was then calculated as a function of *P*<sub>O<sub>2</sub></sub> using:

$$S = \frac{P_{O_2} \exp(n_H)}{P_{O_2} \exp(n_H) + P_{50} \exp(n_H)}. \quad (3)$$

Sa-v<sub>O<sub>2</sub></sub> during acute temperature and/or pH changes was modelled as the difference between Sa<sub>O<sub>2</sub></sub> and Sv<sub>O<sub>2</sub></sub> at physiologically relevant pH and arterial and venous *P*<sub>O<sub>2</sub></sub> values read from RBC OECs. An arterial pH of 7.86 and average values of 85 and 30 mmHg for Pa<sub>O<sub>2</sub></sub> and Pv<sub>O<sub>2</sub></sub> were assumed for resting normoxic Atlantic cod at 12.5°C, based on literature values for this species close to this temperature (Kinkead et al., 1991; Perry et al., 1991; Claireaux and Dutil, 1992; Nelson et al., 1996; Larsen et al., 1997; Karlsson et al., 2011; Petersen and Gamperl, 2011). Pa<sub>O<sub>2</sub></sub> was assumed constant during acute thermal change (Sartoris et al., 2003), whereas values for Pv<sub>O<sub>2</sub></sub> at 5.0 and 20.0°C of 60 and 15 mmHg, respectively, were based on the percentage changes observed by Lannig et al. (2004). Changes in arterial pH were assumed to follow the relationship with temperature established for marine teleosts and elasmobranchs by Ultsch and Jackson (1996). Owing to the generally larger deoxygenation-linked proton uptake in teleost Hbs compared with those of other vertebrates (Berenbrink et al., 2005), venous pH was assumed to be similar to arterial pH, as previously recorded in normoxic Atlantic cod (Perry et al., 1991).

Maximal Sa-v<sub>O<sub>2</sub></sub> at each temperature was taken as the maximally observed Sa-v<sub>O<sub>2</sub></sub> at any pH and Pa<sub>O<sub>2</sub></sub> and Pv<sub>O<sub>2</sub></sub> equalling 85 and 15 mmHg, the lowest average Pv<sub>O<sub>2</sub></sub> reported for Atlantic cod in the literature under any condition.

All values are reported as means±s.e.m. SigmaPlot 12.5 (Systat Software Inc.) was used for all statistical analysis and significance was accepted at *P*<0.05. Differences between mean values were generally assessed by one-way ANOVA, followed by a *post hoc* Tukey test, if relevant. Other test statistics (two- and three-way



**Table 1. Summary of all captured and experimental animals**

|                                                          | Hbl 1/1       | Hbl 1/2       | Hbl 2/2       |
|----------------------------------------------------------|---------------|---------------|---------------|
| No. of captured individuals                              | 48            | 43            | 15            |
| Total length (cm)                                        | 46.1±0.7 (38) | 47.5±0.8 (36) | 43.9±1.2 (10) |
| No. of experimental individuals                          | 6             | 5             | 5             |
| Total length (cm)                                        | 43.8±1.7      | 49.5±3.3      | 46.0±2.6 (4)  |
| Properties of washed RBC cell suspensions                |               |               |               |
| Hct (%)                                                  | 11.2±0.63     | 10.8±0.48     | 10.9±0.64     |
| [Hb <sub>4</sub> ] (mmol l <sup>-1</sup> RBC suspension) | 0.27±0.01     | 0.27±0.02     | 0.28±0.01     |
| MCHC (mmol l <sup>-1</sup> RBC suspension)               | 2.43±0.11     | 2.48±0.08     | 2.62±0.09     |
| ATP/Hb <sub>4</sub> (mol mol <sup>-1</sup> )             | 1.39±0.11     | 1.57±0.18     | 1.27±0.09     |
| GTP/Hb <sub>4</sub> (mol mol <sup>-1</sup> )             | 0.80±0.10     | 0.81±0.08     | 0.76±0.06     |

The number of Atlantic cod of each haemoglobin genotype captured and selected for further experiments, total length, and values for haematocrit (Hct), haemoglobin concentration ([Hb<sub>4</sub>]), mean cellular haemoglobin concentration (MCHC) and ATP/Hb<sub>4</sub> and GTP/Hb<sub>4</sub> molar ratios in washed red blood cells (RBCs) immediately before experiments (means±s.e.m.; differing numbers of experimental individuals are indicated in parentheses).

ANOVA,  $\chi^2$  and one-sample *t*-tests) were used as indicated in the text.

## RESULTS

In 106 Atlantic cod caught between mid-January and the end of February 2015 in the River Mersey Estuary near Liverpool, UK, the Hbl 1/1 genotype dominated (45% of individuals), followed by 41% Hbl 1/2 heterozygotes and just 14% Hbl 2/2 homozygotes (Table 1). These genotype frequencies did not significantly deviate from the expectations according to the Hardy–Weinberg equilibrium ( $\chi^2=1.09$ , d.f.=2,  $P>0.5$ ) or from the averaged values recorded for the Irish Sea between 1971 and 1977 ( $\chi^2=5.73$ , d.f.=2,  $P>0.05$ ; Jamieson and Birley, 1989). Hbl 1 allele frequency was 0.66 and thus among the highest values recorded for Atlantic cod stocks across their geographical range (Ross et al., 2013), and similar to values reported in recent years for the southern North Sea (0.66, Pörtner et al., 2001; 0.64, Andersen et al., 2009). There was no difference in total length between Hbl genotypes in 84 animals that were available for length measurement, or in the subset of 16 animals selected for OECs ( $P=0.073$  and 0.226, respectively; Table 1). In the latter group, there were also no significant Hbl

genotype-related differences in Hct ( $P=0.834$ ), Hb concentration ( $P=0.697$ ), MCHC ( $P=0.371$ ) and ATP/Hb<sub>4</sub> ( $P=0.284$ ) or GTP/Hb<sub>4</sub> ( $P=0.620$ ) ratios of washed RBC suspensions immediately prior to experiments (Table 1). Furthermore, the ATP/Hb<sub>4</sub> and GTP/Hb<sub>4</sub> ratios were similar to values previously reported for whole blood (Leray, 1982).

OECs of Atlantic cod RBCs at all three temperatures and for all three Hbl genotypes revealed strong Bohr and Root effects, as shown by strong pH-induced reductions in RBC O<sub>2</sub> affinity and O<sub>2</sub> saturation at atmospheric  $P_{O_2}$ , respectively (Fig. 1). At each nominal saline pH, increasing temperature appeared to reduce O<sub>2</sub> affinity, shifting OECs to the right and increasing  $P_{50}$  (Fig. 1). However, this effect will have been partially due to the temperature-induced shifts in the pH of the Hepes buffer. Thus, for example, the actual pH values experienced by RBCs suspended in saline with a nominal pH of 7.90 were 7.99, 7.89 and 7.81 at 5.0, 12.5 and 20.0°C, respectively, with s.e.m. values for pH below 0.005.

In the Bohr plot (Fig. 2A), the stepwise reduction of pH from nominal pH 7.90 to 7.65 and then 7.40 resulted in significant increases in  $\log P_{50}$  within all genotypes and all temperatures ( $P<0.001$ ). Thus, the southern Hbl 1/1 genotype at 5.0°C and pH 7.99 had a  $\log P_{50}$  of 1.52±0.02 (corresponding to a  $P_{50}$  of 33 mmHg). As pH decreased, O<sub>2</sub> affinity showed a corresponding decrease, with a  $\log P_{50}$  of 1.79±0.03 ( $P_{50}$  of 62 mmHg) at pH 7.75 and a further decrease at pH 7.51 to 2.20±0.06 ( $P_{50}$  of 158 mmHg). Similar effects of pH were also observed at 12.5 and 20.0°C, although increasing temperatures caused a general shift of curves towards higher  $\log P_{50}$  values and lower pH values (Fig. 2).

Surprisingly,  $\log P_{50}$  values were not affected by Hbl genotype at any tested pH or temperature ( $P=0.161$ – $0.421$ ), although there was a tendency for values in the northern Hbl 2/2 type to be consistently lower than those of the other two genotypes.

The relationship between  $\log P_{50}$  and pH appeared distinctly curvilinear and a three-way ANOVA with pH range, temperature and genotype as factors revealed that the Bohr coefficient  $\phi$ ,  $\Delta \log P_{50} / \Delta \text{pH}$ , significantly increased in magnitude from around  $-1.08$  in the higher pH range to about  $-1.65$  in the lower pH range ( $P<0.001$ ). This increased pH dependence of RBC O<sub>2</sub> affinity at lower pH is likely to be due to the more pronounced Root effect at the lowest pH values. Both genotype and temperature had no significant effect on the Bohr coefficient ( $P=0.183$  and 0.840, respectively).

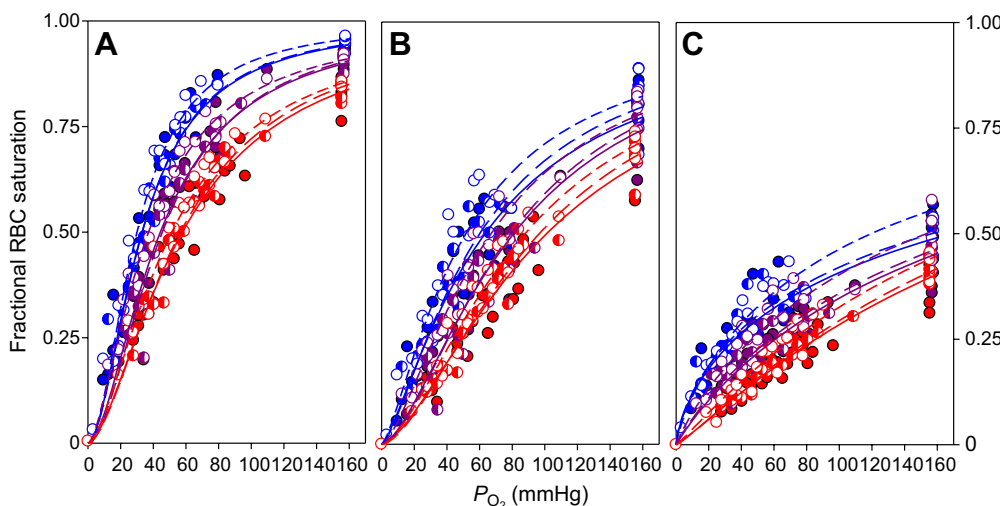

**Fig. 1. Oxygen equilibrium curves of Atlantic cod red blood cells (RBCs) with different haemoglobin Hbl genotypes.** Data are for 5.0, 12.5 and 20.0°C (blue, purple and red, respectively) and at nominal saline pH values of (A) 7.90, (B) 7.65 and (C) 7.40. Circles indicate measured values while lines are based on sigmoidal curve fits for each temperature and Hbl genotype (Hbl 1/1, solid lines, filled symbols,  $N=6$ ; Hbl 1/2, long-dashed lines, half-filled symbols,  $N=5$ ; Hbl 2/2, short-dashed lines, open symbols,  $N=5$ ). For each individual, five data points were obtained at each pH and temperature.

**Table 2.** Parameters for 2nd order polynomial fits of  $\log P_{50}$  or  $n_H$  ( $y$ ) as a function of pH ( $x$ ), according to  $y=ax^2+bx+c$ , of the individual data in Figs 1 and 2 with all genotypes pooled together

| $t$ ( $^{\circ}\text{C}$ ) | $\log P_{50}$ |                 |                 | $n_H$          |                 |                   |
|----------------------------|---------------|-----------------|-----------------|----------------|-----------------|-------------------|
|                            | $a$           | $b$             | $c$             | $a$            | $b$             | $c$               |
| 5.0                        | 1.2 $\pm$ 0.2 | -20.2 $\pm$ 3.5 | 85.4 $\pm$ 13.4 | -2.8 $\pm$ 0.8 | 45.6 $\pm$ 12.7 | -185.1 $\pm$ 49.3 |
| 12.5                       | 1.1 $\pm$ 0.2 | -18.6 $\pm$ 3.4 | 78.2 $\pm$ 9.2  | -4.4 $\pm$ 0.7 | 69.8 $\pm$ 10.5 | -273.5 $\pm$ 40.2 |
| 20.0                       | 1.3 $\pm$ 0.1 | -21.5 $\pm$ 1.7 | 88.7 $\pm$ 6.6  | -3.8 $\pm$ 0.6 | 59.6 $\pm$ 8.8  | -230.4 $\pm$ 33.4 |

$P_{50}$  was measured in mmHg;  $n_H$  is the Hill coefficient (cooperativity at 50% saturation);  $t$  is temperature. Data are means $\pm$ s.e.,  $N=16$ .

Hill's cooperativity constant  $n_H$  did not vary significantly between the upper two saline pH values at any temperature, attaining values between 1.5 and 2.0 (Fig. 2B). At the lowest saline pH, however,  $n_H$  was significantly reduced down to values between 1.0 and 0.7 compared with the highest saline pH ( $P<0.001$ ), indicating the onset of the Root effect. Similar to  $\log P_{50}$  above,  $n_H$  also remained unaffected by HbI genotype at all pH values and temperatures ( $P=0.161$ – $0.421$ ). Given the lack of significant Hb genotype differences in all analyses above, data for all animals were pooled for the following analyses.

After standardising  $\log P_{50}$  values of the combined HbI genotypes to constant pH values (Table 2),  $\log P_{50}$  at pH 7.65 was completely independent of temperature over the entire range from 5.0 to 20.0 $^{\circ}\text{C}$  (Table 3). At pH 7.90,  $\log P_{50}$  was also statistically indistinguishable between 5.0 $^{\circ}\text{C}$  and 12.5 $^{\circ}\text{C}$ , and only increased significantly at 20.0 $^{\circ}\text{C}$  compared to these values ( $P=0.002$  and  $P<0.001$ , respectively; Table 3). At pH 7.40,  $\log P_{50}$  was unaffected by temperature between 20.0 and 12.5 $^{\circ}\text{C}$ , and only significantly increased at 5 $^{\circ}\text{C}$  compared to these values

( $P<0.001$ ), revealing a reversed temperature sensitivity at the lower temperature range.

The pH-adjusted cooperativity coefficient  $n_H$  (Table 2) was unaffected by temperature at pH 7.9 ( $P=0.412$ ; Table 3), but at pH 7.65 it was significantly reduced at 5.0 $^{\circ}\text{C}$  when compared with that at 12.5 and 20.0 $^{\circ}\text{C}$  ( $P<0.001$ ), although values at 12.5 and 20 $^{\circ}\text{C}$  did not differ significantly. At pH 7.4,  $n_H$  significantly increased with temperature over the whole range ( $P<0.001$ ; Table 3).

$\Delta H'$  for the oxygenation reaction of Atlantic cod RBCs was significantly affected by both pH ( $P<0.001$ ) and temperature range ( $P<0.001$ ), with no significant interaction ( $P=0.574$ ) between factors (two-way ANOVA, with temperature range and pH as factors; Fig. 3). Between 12.5 and 20.0 $^{\circ}\text{C}$  and at pH 7.90, Atlantic cod RBCs showed a typical exothermic oxygenation reaction, with a negative  $\Delta H'$  value of  $-15.7\pm 2.9$  kJ mol $^{-1}$ . However, in the same thermal range, thermal sensitivity was significantly reduced at pH 7.65 and 7.40, where  $\Delta H'$  values amounted to  $-2.5\pm 1.9$  and  $+5.8\pm 3.9$  kJ mol $^{-1}$ , respectively. These values were not significantly different from each other and one-sample  $t$ -tests showed that they also did not significantly differ from zero ( $P=0.208$  and  $0.158$ , respectively; Fig. 3). At all pH values, the magnitude of  $\Delta H'$  was significantly higher between 5.0 and 12.5 $^{\circ}\text{C}$  than between 12.5 and 20.0 $^{\circ}\text{C}$ . In the lower temperature range at pH 7.9, this resulted in a  $\Delta H'$  value of  $-3.8\pm 2.3$  kJ mol $^{-1}$ , which was not significantly different from zero (one-sample  $t$ -test,  $P=0.119$ ). Stepwise, significantly more endothermic RBC oxygenation was

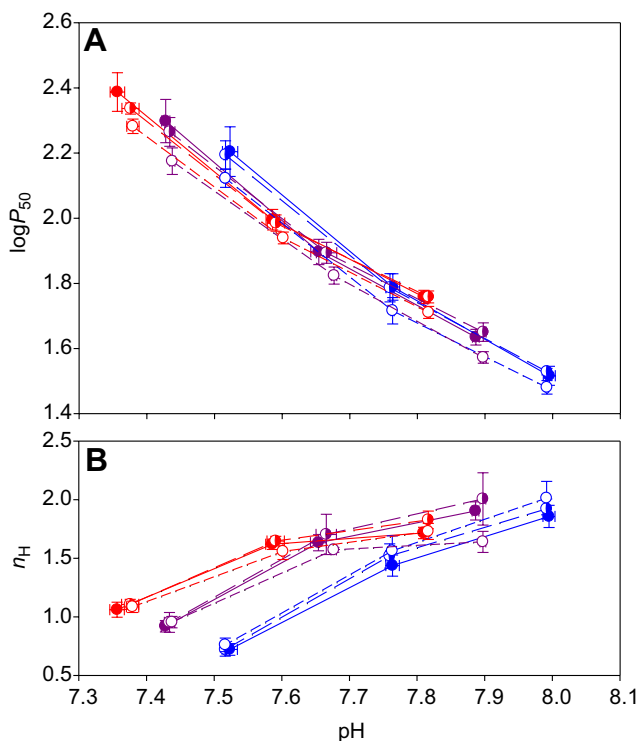

**Fig. 2.** Effect of pH, HbI genotype and temperature on the affinity and cooperativity of  $\text{O}_2$  binding in Atlantic cod RBCs. (A) Mean $\pm$ s.e.m.  $\log P_{50}$  versus pH for HbI 1/1 (filled symbols, solid lines,  $N=6$ ), HbI 1/2 (half-filled symbols, long-dashed lines,  $N=5$ ) and HbI 2/2 (open symbols, short-dashed lines,  $N=5$ ), at 5.0, 12.5 and 20.0 $^{\circ}\text{C}$  (blue, purple and red, respectively).  $P_{50}$  was measured in mmHg. (B) Mean $\pm$ s.e.m.  $n_H$ , Hill's cooperativity coefficient, at 50% RBC  $\text{O}_2$  saturation, for the same data as in A.

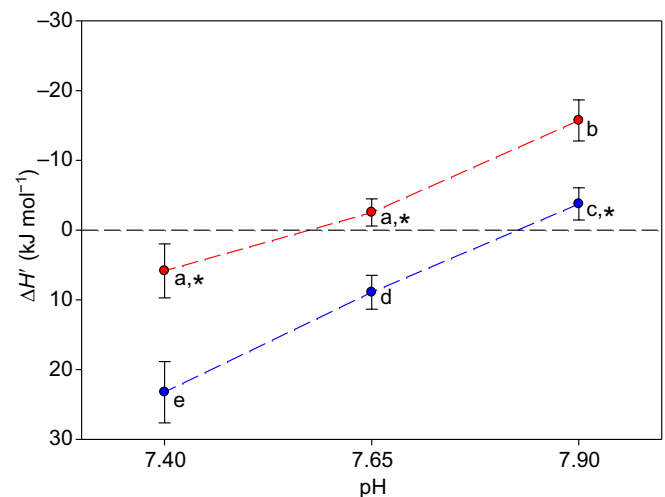

**Fig. 3.** Apparent heat of oxygenation,  $\Delta H'$ , for Atlantic cod RBCs. Values between 5.0 and 12.5 $^{\circ}\text{C}$  (blue) and 12.5 and 20.0 $^{\circ}\text{C}$  (red) are shown at each reference pH (means $\pm$ s.e.m.,  $N=16$ ). Note reversal of the  $y$ -axis, with negative values denoting an exothermic reaction at the top. Different letters within a temperature interval or at constant pH indicate significantly different  $\Delta H'$  values (two-way ANOVA). \*Values not significantly different from zero (one-sample  $t$ -test).

**Table 3. Oxygen equilibrium curve (OEC) properties, corrected for pH change with temperature, of Atlantic cod RBCs, with all Hb genotypes combined, when exposed to a range of temperatures and pH values**

| pH   | $\log P_{50}$          |                        |                        | $n_H$                  |                        |                        |
|------|------------------------|------------------------|------------------------|------------------------|------------------------|------------------------|
|      | 5.0°C                  | 12.5°C                 | 20.0°C                 | 5.0°C                  | 12.5°C                 | 20.0°C                 |
| 7.90 | 1.60±0.01 <sup>a</sup> | 1.61±0.02 <sup>a</sup> | 1.69±0.01 <sup>b</sup> | 1.79±0.06 <sup>a</sup> | 1.86±0.09 <sup>a</sup> | 1.71±0.05 <sup>a</sup> |
| 7.65 | 1.93±0.02 <sup>a</sup> | 1.89±0.02 <sup>a</sup> | 1.90±0.01 <sup>a</sup> | 1.19±0.04 <sup>a</sup> | 1.61±0.05 <sup>b</sup> | 1.68±0.03 <sup>b</sup> |
| 7.40 | 2.42±0.04 <sup>a</sup> | 2.31±0.03 <sup>b</sup> | 2.28±0.02 <sup>b</sup> | 0.25±0.08 <sup>a</sup> | 0.80±0.04 <sup>b</sup> | 1.18±0.03 <sup>c</sup> |

$P_{50}$  was measured in mmHg;  $n_H$  is the Hill coefficient (cooperativity at 50% saturation). Data are means±s.e.m.,  $N=16$ .

For each parameter, different superscript letters within a row indicate significant differences (one-way ANOVA for  $\log P_{50}$  and one-way ANOVA on ranks for  $n_H$ ).

observed at pH 7.65 (+8.9±2.4 kJ mol<sup>-1</sup>) and then pH 7.40 (+23.2±4.4 kJ mol<sup>-1</sup>).

Using 2nd order polynomials (Table 2),  $\log P_{50}$  and  $n_H$  values from Fig. 2 were standardised for a series of fixed pH values and the corresponding OECs shown for three temperatures (Fig. 4). At each temperature, literature values for *in vivo*  $P_{aO_2}$  and  $P_{vO_2}$  and the resulting  $S_{a-vO_2}$  are indicated for each pH. The curves suggest *in vivo* arterial  $O_2$  saturations, across temperature, at resting arterial pH (7.91–7.81 between 5.0 and 20.0°C, respectively) and constant arterial  $P_{O_2}$  (85 mmHg) of no more than 80% (Fig. 4A–C). Increasing temperatures are associated with greater use of the venous reserve, as shown by decreases in  $P_{vO_2}$ , and consequent increases in  $S_{a-vO_2}$  from 0.11 at 5.0°C to 0.44 and 0.58 at 12.5°C and 20.0°C, respectively. Further, at each temperature and with fixed  $P_{aO_2}$  and  $P_{vO_2}$  values, acidification-induced decreases in  $S_{vO_2}$  were accompanied by similar, or even greater decreases in  $S_{aO_2}$  (Fig. 4A–C). This suggests that in Atlantic cod RBCs the benefits of the Bohr effect under general acidosis in facilitating  $O_2$  offloading to tissues at a given  $P_{vO_2}$  are minimised by parallel or even greater decreases in arterial  $O_2$  loading.

Estimates of maximal  $S_{a-vO_2}$  values at 5, 12.5 and 20.0°C (Fig. 4D–F) show a substantial potential for increasing  $S_{a-vO_2}$  above routine values at 5.0 and 12.5°C, where  $S_{a-vO_2}$  rises by factors of 4–5 and 1.5–2.0, respectively, when  $P_{vO_2}$  is allowed to drop to the minimally observed value of 15 mmHg (Fig. 4E,F versus A,B). However, there was no additional capacity for  $S_{a-vO_2}$  increases above routine values at 20.0°C (Fig. 4C,F). Similarly, across pH values, maximal  $S_{a-vO_2}$  values tended to decrease, rather than increase, with temperature, such that even taking into account a temperature-associated decrease in *in vivo* arterial pH from 7.91 at 5.0°C to 7.81 at 20.0°C did not increase  $S_{a-vO_2}$  (Fig. 4D–F).

## DISCUSSION

The results of the present study suggest that the  $O_2$  binding properties of Atlantic cod RBCs near their southern, upper thermal distribution limit in the north-east Atlantic are, contrary to common expectations, independent of HbI genotype, characterised by an unusually low  $O_2$  affinity that is strongly affected by pH and remarkably temperature insensitive over much of the physiological pH range. These factors combine to create a blood  $O_2$  transport system in which maximal  $S_{a-vO_2}$  under *in vivo* conditions does not increase with temperature or general blood acidosis, which universally accompanies elevated temperature across ectothermic vertebrates (Ultsch and Jackson, 1996). This is surprising in light of the fact that increased temperature and general blood acidification are the classic textbook examples of how the rate of  $O_2$  supply to tissues can be increased by right-shifts of the OEC and increased  $S_{a-vO_2}$  (Barcroft and King, 1909; Bohr et al., 1904; Dejours, 1975; Berenbrink, 2006, 2011a). Similarly, temperature-dependent differences in  $O_2$  affinity between the HbI genotypes of Atlantic

cod were thought to be crucial in the adaptation of this species to environmental temperature for more than 35 years (Karpov and Novikov, 1980; Andersen, 2012; Ross et al., 2013). The clear lack of both a temperature and HbI genotype effect on RBC  $O_2$  affinity demonstrated in the present study, together with results from carefully controlled whole-animal studies (Gamperl et al., 2009), points to an emerging paradigm shift in our understanding of thermal adaptation of  $O_2$  supply mechanisms and the roles of HbI genotype differences in Atlantic cod. In the following discussion, the results are critically evaluated and the underlying mechanisms and consequences for maximal circulatory  $O_2$  supply rates of Atlantic cod at elevated temperatures are discussed.

### Low $O_2$ binding affinity of Atlantic cod RBCs

The average  $P_{50}$  of Atlantic cod RBCs across the three genotypes was 40 mmHg (calculated from  $\log P_{50}$  values at pH 7.90 between 5.0 and 12.5°C in Table 3). This value is among the lowest  $O_2$  affinities that have been reported for blood or RBCs of any fish under the standardised conditions given above (e.g. Herbert et al., 2006). Such a low  $P_{50}$  results in arterial blood in gills lying on the edge of the steep part of the OEC, with modelled RBC  $O_2$  saturations of no more than 80% at typical  $P_{O_2}$  and pH values and at any temperature between 5.0 and 20.0°C (Fig. 4). This guarantees that across all temperatures, small decreases in venous  $P_{O_2}$  enable large increases in  $O_2$  unloading in the tissues at a relatively high venous  $P_{O_2}$ , which will safeguard a sufficiently large diffusion gradient from the blood plasma to tissue mitochondria. Blood  $O_2$  tissue extraction [ $S_{a-vO_2}/S_{aO_2}$ ] was accordingly as high as 53% for normoxic resting animals at pH 7.90 and 12.5°C (calculated from Fig. 4A), which compares well with estimates in Atlantic cod *in vivo* under similar conditions (57%, Perry et al., 1991; 51%, Petersen and Gamperl, 2011). The high venous unloading  $P_{O_2}$  may be particularly important for cardiac  $O_2$  supply in species like Atlantic cod, where the ventricle lacks a coronary blood supply and consists entirely of spongy myocardium that relies exclusively on the  $O_2$  remaining in luminal blood that is returned from the other tissues (Santer and Walker, 1980; Farrell et al., 2012). However, too low a blood  $O_2$  affinity comes at the cost of potentially reducing the efficiency of a further right-shift of the OEC for increasing  $S_{a-vO_2}$  under, for example, warming or general acidosis.

### (In)efficiency of the Bohr effect in enhancing $O_2$ supply under general acidosis

The low  $O_2$  affinity of Atlantic cod RBCs was paired with one of the largest Bohr effects reported for blood or RBCs under controlled standard conditions ( $\Delta \log P_{50}/\Delta pH = -1.08 \pm 0.05$ , pH 7.9 to 7.65 and 5.0 to 20.0°C). At still lower pH values, the pH-induced decline in RBC  $O_2$  affinity was associated with a reduced cooperativity of RBC  $O_2$  binding and with  $O_2$  saturations below 60% in air-equilibrated RBCs. This indicated a strong Root effect and confirmed the positive correlation between the

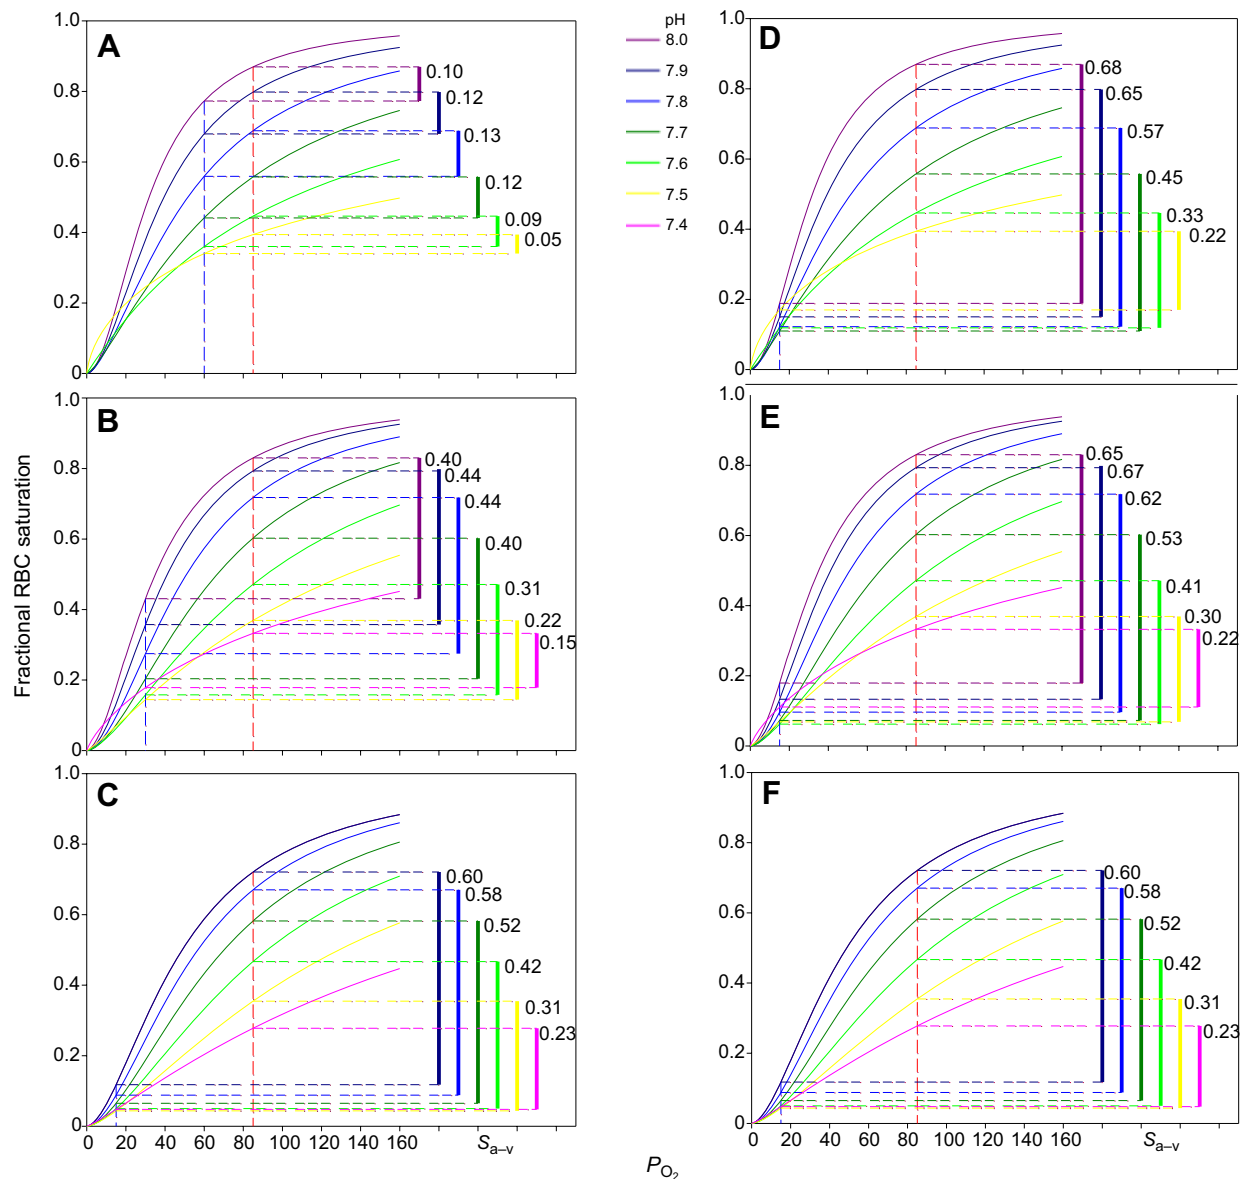

**Fig. 4. Modelled RBC O<sub>2</sub> equilibrium curves (OECs) and arterio-venous O<sub>2</sub> saturation differences in Atlantic cod at different values for pH and temperature.** OECs are shown for a series of standardised pH values and temperatures of 5.0°C (A,D), 12.5°C (B,E) and 20.0°C (C,F). Red dashed vertical lines indicate routine arterial  $P_{O_2}$  values,  $P_{aO_2}$ . Blue dashed vertical lines indicate either resting mixed venous  $P_{O_2}$  values ( $P_{vO_2}$ , A–C) or minimally observed mixed venous  $P_{O_2}$  values ( $P_{vO_2,min}$ , D–F) (see Materials and methods). Corresponding arterial and venous O<sub>2</sub> saturation,  $S_{aO_2}$  and  $S_{vO_2}$ , and their difference,  $S_{a-vO_2}$ , are indicated for each pH by colour-matched horizontal dashed lines and vertical bars, respectively. Because of pH shifts with temperature in the underlying data set (Fig. 2), OECs were not modelled for pH 8.0 at 20.0°C and pH 7.4 at 5.0°C.

magnitudes of the Bohr and Root effects that has been found across a wide range of diverse ray-finned fishes (Berenbrink et al., 2005). Low O<sub>2</sub> affinity and a strong Bohr effect were both previously reported for Atlantic cod haemolysates in the presence of saturating ATP concentrations (Pörtner et al., 2001; Brix et al., 2004; Verde et al., 2006). Importantly, these findings on Hb solutions in artificial buffers also closely reflect results for Atlantic cod whole blood in the presence of a physiological CO<sub>2</sub>/bicarbonate buffer system (Herbert et al., 2006). Bohr et al. (1904) first emphasised the biological importance of elevated blood carbon dioxide partial pressure ( $P_{CO_2}$ ) and thereby blood acidification for enhancing blood O<sub>2</sub> utilisation in the tissues, without affecting O<sub>2</sub> uptake at the higher  $P_{O_2}$  values in the respiratory organ. The present study surprisingly suggests that

these generally accepted benefits of the Bohr effect are partially cancelled in Atlantic cod as a result of their low blood O<sub>2</sub> affinity, whereby any decrease in  $S_{vO_2}$  during general acidosis is accompanied by a similar or even larger decrease in  $S_{aO_2}$ , such that  $S_{a-vO_2}$  remains the same or even decreases upon acidification (Fig. 4). Thus, the unusually large effect of elevated CO<sub>2</sub> or low pH on Atlantic cod RBC O<sub>2</sub> binding affinity and capacity (Krogh and Leitch, 1919; Herbert et al., 2006; Berenbrink et al., 2011) will be mainly useful during localised tissue acidification, such as at the tissue poles of the vascular counter-current exchangers (*retia mirabilia*) in the eye and swim bladder of Atlantic cod, where they are crucial for generating super-atmospheric  $P_{O_2}$  values that support the high metabolic demands of the poorly vascularised retina, and for swim bladder gas filling



against increasing hydrostatic pressures at depth (Bohr, 1894; Wittenberg and Wittenberg, 1962; Berenbrink et al., 2005; Berenbrink, 2007).

These considerations do not negate the benefits of the Bohr effect in increasing  $Sa-v_{O_2}$  because of arterio-venous pH differences that are caused by the differences in arterial and venous  $P_{CO_2}$  or by selective short-circuiting of catecholamine-activated RBC intracellular pH regulation in tissues with plasma-accessible carbonic anhydrase, as recently suggested for rainbow trout (Rummer et al., 2013). Instead, they emphasise that parallel pH shifts in arterial and venous blood, such as during exercise-induced lactacidosis or environmental warming, are unlikely to increase  $Sa-v_{O_2}$  in Atlantic cod at physiological  $Pa_{O_2}$  and minimal  $Pv_{O_2}$ . Any increases in circulatory blood  $O_2$  supply under these conditions must come from increases in cardiac output, blood  $O_2$  capacity or alternative mechanisms that may increase  $Sa-v_{O_2}$ .

### Reduced and reversed thermal sensitivity of $O_2$ binding in Atlantic cod RBCs

Whole-body or local increases in temperature, such as in working muscle, are classically thought to increase blood  $O_2$  transport by increasing  $Sa-v_{O_2}$  (Barcroft and King, 1909). In many animals, the intrinsically exothermic nature of haem  $O_2$  binding determines the overall heat of Hb oxygenation, resulting in a lowered Hb  $O_2$  affinity at elevated temperature (Weber and Campbell, 2011). However, binding of allosteric effectors such as protons and ATP or GTP preferentially to deoxyHb requires their endothermic release during oxygenation and this can compensate for the heat released by exothermic haem oxygenation, leading to a reduced or even reversed temperature sensitivity of Hb  $O_2$  affinity. This is best known for heterothermic tuna, billfishes and lamnid sharks, where exothermic Hb  $O_2$  binding may cause problems in heat-conserving vascular counter-current exchangers (Weber and Campbell, 2011). The finding of largely thermally insensitive RBC  $O_2$  affinity in Atlantic cod in this study, together with the study by Clark et al. (2010) on Pacific mackerel, suggests that low thermal sensitivity of RBC  $O_2$  affinity may be more widespread among ectotherm fishes than previously thought.

Normally, with an overall exothermic reaction of Hb  $O_2$  binding, increased temperatures decrease Hb  $O_2$  affinity and cause a right-shift of the OEC. This will generally allow an increased  $Sa-v_{O_2}$  in any organism with  $Sa_{O_2}$  and  $Pa_{O_2}$  in the flat upper part of the OEC because a decrease in  $Sv_{O_2}$  allows a greater exploitation of the venous reserve. However, for a species with a RBC  $O_2$  affinity as low as reported for Atlantic cod in the present study, any gain in  $O_2$  offloading by a decrease in  $Sv_{O_2}$  will be obliterated by a parallel decrease in  $Sa_{O_2}$  at typical  $Pa_{O_2}$ . This may be the ultimate, evolutionary driving cause of the reduced thermal sensitivity of  $O_2$  binding in Atlantic cod RBCs.

The proximate, mechanistic explanation for the phenomenon may involve at least two not necessarily exclusive factors. First, the large Bohr effect suggests an above average increase in the number of proton binding sites in deoxyHb compared with oxyHb (for review, see Berenbrink, 2006, 2011a). The release of these protons during oxygenation may compensate for exothermic haem  $O_2$  binding. This is supported by the strong effect of pH on the overall enthalpy of RBC oxygenation over the whole temperature range (Fig. 3). Second, the increase in cooperativity of RBC  $O_2$  binding with temperature at low pH (Table 3) suggests that the over-stabilisation of deoxyHb by the Root effect (with  $n_H \leq 1$ ; see Berenbrink, 2011b) is weakened at higher temperatures, where increasing values of  $n_H$  indicate an endothermic transition to the oxy conformation of Hb. This is consistent with previous work

demonstrating the large endothermic nature of the deoxyHb to oxyHb conformational transition in teleosts (Saffran and Gibson, 1979). In addition, the endothermic release of the organic phosphate modulators ATP and GTP from deoxyHb upon oxygenation may contribute to the overall heat of oxygenation of Atlantic cod RBCs, a mechanism that has previously been shown to contribute to the reduced and reversed oxygenation enthalpy of several species of billfish (Weber et al., 2010). However, elucidation of the detailed molecular mechanism(s) behind reduced or even reversed thermal sensitivity of Atlantic cod RBC  $O_2$  affinity awaits detailed studies on purified Hbs under tightly controlled conditions of allosteric modifiers.

### Lack of HbI genotype effects on $O_2$ binding in Atlantic cod RBCs

The increased frequency of the HbI 1 allele towards the southern range of Atlantic cod has been widely related to a parallel cline in environmental temperature and to a presumed advantage of HbI 1/1 cod in having a higher RBC  $O_2$  affinity at temperatures above 15°C compared with HbI 2/2 cod where this is higher below 15°C (e.g. Karpov and Novikov, 1980; Andersen et al., 2009; reviewed by Andersen, 2012, and Ross et al., 2013). The current study establishes the absence of any statistically supported differences in the RBC  $O_2$  binding characteristics between Atlantic cod of all three HbI genotypes near their southern upper thermal distribution limit. This result has been consistently obtained over a range of pH values at each of three physiologically relevant temperatures and is considered robust, because factors well known to modify the genetically determined, intrinsic  $O_2$  binding affinity of Hb inside RBCs have been carefully controlled. To ensure environmental relevance but at the same time minimise differences in prior thermal or hypoxic acclimatisation of individuals, RBCs were obtained immediately after capture from wild Atlantic cod at a single location and over a 6 week period in winter where long-term annual water temperature changes were minimal and stratification was absent (Neat et al., 2014; O'Boyle and Nolan, 2010). In contrast to earlier studies (Karpov and Novikov, 1980; Gollock et al., 2006; Petersen and Gamperl, 2011), RBCs were washed in glucose-containing physiological saline and incubated overnight before experimentation. This removes any catecholamine hormones, which are known to be released into plasma during blood sampling stress and modify the concentration of intracellular allosteric modifiers of Hb  $O_2$  binding, and allows any catecholamine-initiated effects to wear off during pre-incubation in standardised physiological saline (Berenbrink and Bridges, 1994a,b). This ensures equilibration of extracellular and intracellular ion concentrations and well-defined RBC extracellular and intracellular pH values (Berenbrink and Bridges, 1994a,b) and resulted in comparable RBC intracellular Hb and nucleotide triphosphate concentrations between HbI genotypes that were similar to values in fresh whole blood (Table 1; Leray, 1982). Extreme dilution of RBCs (Hct 0.08–0.13%) in buffered physiological saline ensured full control of RBC extracellular pH and ion composition during the actual OEC measurements and avoided the need for correction of points on the OECs to constant pH, which may otherwise vary by more than 0.1 pH units with oxygenation status in Atlantic cod whole blood *in vitro* (Herbert et al., 2006). Extreme dilution also avoided potential problems with RBC  $O_2$  consumption that may have been behind a zero  $O_2$  content at  $P_{O_2}$  values of 15 mmHg in OECs obtained at high Hct with a gasometric method (Gollock et al., 2006; Petersen and Gamperl, 2011). Full spectrophotometric assessment of RBC  $O_2$  saturation between 500 and 700 nm in the present study also avoided having to assume full RBC  $O_2$  saturation at some arbitrary high



$P_{O_2}$  which may have led to a systematic overestimation of  $O_2$  saturation and affinity in some previous studies (Karpov and Novikov, 1980; Gollock et al., 2006; Herbert et al., 2006; Petersen and Gamperl, 2011). Finally, 5–6 specimens per HbI genotype were used to reduce outlier effects in the interpretation of the results. Together, this makes the present study the most comprehensive test yet for HbI genotype differences in RBC  $O_2$  binding properties. The negative finding in this study raises the question: what other characteristic(s), if any, of the different HbI alleles is behind the documented differences in geographical distribution, growth rates, hypoxia tolerance and preference temperature (reviewed by Andersen, 2012; Ross et al., 2013)?

#### Possible reasons for the variability of HbI genotype effects

In theory, any potentially existing genetic differences in the intrinsic  $O_2$  binding characteristics between the Hb genotypes, or in their interactions with allosteric modulators such as organic phosphates, could have been masked in the present study by the large phenotypic plasticity in Hb  $O_2$  binding properties of ectotherms (Weber and Jensen, 1988). However, despite several attempts, the alleged large genotype effects reported for RBCs by Karpov and Novikov (1980) have been difficult to reproduce in haemolysates of the different genotypes in the presence of controlled levels of allosteric modifiers (e.g. in both the presence and the absence of ATP; Brix et al., 1998; Colosimo et al., 2003; Brix et al., 2004). This rather suggests that the differences found by Karpov and Novikov (1980) at the RBC level may have been due to phenotypic plasticity rather than Hb genotype, such as different levels of intracellular organic phosphates or different degrees of catecholamine stimulation. Unfortunately, we do not have any information on RBC organic phosphate levels or treatments aimed at controlling catecholamine effects from Karpov and Novikov's (1980) study. Thus, while there is evidence for effects of Hb genotype on Atlantic cod behaviour in thermal choice experiments (Petersen and Steffensen, 2003; Behrens et al., 2012), the present study shows that they are not necessarily due to differences in RBC oxygen affinity. These considerations are in line with Gamperl et al. (2009), who have suggested that the adaptive value of the different Atlantic cod Hb genotypes on  $O_2$  supply rates in different environments may have been overemphasised.

As an alternative explanation, natural selection of HbI genotypes may act on life history stages other than the juveniles or adults that are most commonly studied. For example, unfertilised eggs of Atlantic cod have been shown to contain transcripts of all four major adult expressed globins, including the  $\beta 1$  globin responsible for the HbI polymorphism (Wetten et al., 2010). The functional relevance of these gene products, by necessity of maternal origin, is unclear and transcripts disappear upon fertilisation in the embryonic stages until expression is switched on again later in juveniles and adults (Wetten et al., 2010). However, if the maternal HbI genotype in eggs affects their fertilisation success, then this may explain the significantly skewed HbI genotype ratios in offspring of heterozygote parents that was observed by Gamperl et al. (2009) and was later in life balanced by significantly higher growth rates of the under-represented genotype. Thus, differing costs and benefits during different life history stages and/or in different micro-environments may lead to balanced HbI polymorphisms that differ in HbI 1 frequency across the distribution range.

In addition, the HbI polymorphism may be genetically linked to other traits that are under selection, such as the regulatory polymorphism of the HbI promoter in Atlantic cod (Star et al., 2011; Andersen, 2012), which may be responsible for the HbI genotype-associated differences in Hct and Hb concentration

observed in some studies (Mork and Sundnes, 1984). Clearly, we are only just beginning to understand the molecular mechanisms enabling adaptation of marine ectotherms to environmental temperature change and more studies linking the genetics, physiology, ecology and evolution of these organisms are required.

#### Concluding remarks on physiological consequence of Atlantic cod RBC $O_2$ binding characteristics

Atlantic cod are regularly exposed to acute temperature shifts in their natural environments, similar to those employed in the present study; for example, during upwelling and turbulent mixing events of water bodies with different temperatures (Freitas et al., 2015), or when crossing the thermocline (Righton et al., 2010). The latter is particularly relevant for Irish Sea cod that continue actively changing depth during the warmer summer months, compared with North Sea cod that remain confined in bottom waters from June to September (Righton et al., 2001; Righton and Metcalfe, 2002). Our modelling approach suggests that during acute warming the  $O_2$  binding characteristics of Atlantic cod RBCs will enable uncompromised gill  $O_2$  loading at *in vivo* arterial  $P_{O_2}$  values and at the same time permit increased  $O_2$  offloading at falling venous  $P_{O_2}$ . However, the theoretical maximal  $Sa-v_{O_2}$  at physiological pH and arterial and venous  $P_{O_2}$  does not increase with temperature (Fig. 4D–F), and is already reached under conditions of acute gradual warming to 20°C (Fig. 4C,F). Under these conditions, Atlantic cod can only further increase the capacity of their circulatory  $O_2$  transport system by increasing blood  $O_2$  capacity and/or cardiac output. However, in a complex network of feedback systems, an increase in cardiac output may itself be limited, firstly by low  $P_{O_2}$  of cardiac luminal blood returning from systemic tissues, secondly by an increased cardiac workload and thus  $O_2$  demand imposed by the higher viscosity of blood with an increased RBC number, and lastly by  $O_2$  supply-independent physiological and anatomical limits to cardiac performance such as maximal heart rate and ventricle size, respectively. Ultimately, when all these avenues to increase blood  $O_2$  transport rate are exhausted, long-term preservation of aerobic scope for activity at elevated temperature may rely on the extent to which standard metabolic rate can be reduced by thermal acclimatisation.

#### Acknowledgements

This work forms part of the requirements by the University of Liverpool for considering the award of PhD to S.L.B. We would like to thank the Liverpool fishermen Ste Dalton and Lee on the Girl Grey and Kev McKie on the Brigand for their support in obtaining specimens.

#### Competing interests

The authors declare no competing or financial interests.

#### Author contributions

S.L.B., J.M., D.A.R. and M.B. conceived the project and interpreted the findings. S.L.B. and M.B. designed the study. S.L.B. executed the experiments and drafted the manuscript. S.L.B., D.A.R. and M.B. revised the manuscript.

#### Funding

This work was funded by an Industrial CASE (Collaborative Award in Science and Engineering) Partnership award by the UK's Biotechnology and Biological Sciences Research Council (BBSRC) between the Centre for Environment, Fisheries and Aquaculture Science (CEFAS) at Lowestoft and the University of Liverpool. Deposited in PMC for immediate release.

#### References

- Albers, C., Goetz, K.-H. and Hughes, G. M. (1983). Effect of acclimation temperature on intraerythrocytic acid-base balance and nucleoside triphosphates in the carp, *Cyprinus carpio*. *Respir. Physiol.* **54**, 145–159.
- Andersen, Ø. (2012). Hemoglobin polymorphisms in Atlantic cod—A review of 50 years of study. *Mar. Genomics* **8**, 59–65.

- Andersen, Ø., Wetten, O. F., De Rosa, M. C., Andre, C., Carelli Alinovi, C., Colafranceschi, M., Brix, O. and Colosimo, A. (2009). Haemoglobin polymorphisms affect the oxygen-binding properties in Atlantic cod populations. *Proc. R. Soc. B* **276**, 833–841.
- Barcroft, J. and King, W. O. (1909). The effect of temperature on the dissociation curve of blood. *J. Physiol.* **39**, 374–384.
- Beggs, S. E., Cardinale, M., Gowen, R. J. and Bartolino, V. (2014). Linking cod (*Gadus morhua*) and climate: investigating variability in Irish Sea cod recruitment. *Fish. Oceanography* **23**, 54–64.
- Behrens, J. W., Gräns, A., Therkildsen, N. O., Neuenfeldt, S. and Axelsson, M. (2012). Correlations between hemoglobin type and temperature preference of juvenile Atlantic cod *Gadus morhua*. *J. Exp. Mar. Biol. Ecol.* **413**, 71–77.
- Berenbrink, M. (2006). Evolution of vertebrate haemoglobins: Histidine side chains, specific buffer value and Bohr effect. *Respir. Physiol. Neurobiol.* **154**, 165–184.
- Berenbrink, M. (2007). Historical reconstructions of evolving physiological complexity: O<sub>2</sub> secretion in the eye and swimbladder of fishes. *J. Exp. Biol.* **210**, 1641–1652.
- Berenbrink, M. (2011a). Transport and exchange of respiratory gases in the blood: evolution of the Bohr effect. In *Encyclopedia of Fish Physiology: From Genome to Environment* (ed. A. P. Farrell), pp. 921–928. Amsterdam: Elsevier.
- Berenbrink, M. (2011b). Transport and exchange of respiratory gases in the blood: Root effect: molecular basis, evolution of the Root effect and rete systems. In *Encyclopedia of Fish Physiology: From Genome to Environment* (ed. A. P. Farrell), pp. 929–934. Amsterdam: Elsevier.
- Berenbrink, M. and Bridges, C. (1994a). Catecholamine-activated sodium/proton exchange in the red blood cells of the marine teleost *Gadus morhua*. *J. Exp. Biol.* **192**, 253–267.
- Berenbrink, M. and Bridges, C. (1994b). Active Na<sup>+</sup>, Cl<sup>-</sup> and HCO<sub>3</sub><sup>3--</sup>-dependent acid extrusion in Atlantic cod red blood cells in winter activated by hypercapnia. *J. Exp. Biol.* **192**, 239–252.
- Berenbrink, M., Koldkjaer, P., Kepp, O. and Cossins, A. R. (2005). Evolution of oxygen secretion in fishes and the emergence of a complex physiological system. *Science* **307**, 1752–1757.
- Berenbrink, M., Koldkjaer, P., Wright, E. H., Kepp, O. and da Silva, J. A. (2011). Magnitude of the Root effect in red blood cells and haemoglobin solutions of fishes: a tribute to August Krogh. *Acta Physiol.* **202**, 583–592.
- Bohr, C. (1894). The influence of section of the vagus nerve on the disengagement of gases in the air-bladder of fishes. *J. Physiol.* **15**, 494–500.
- Bohr, C., Hasselbalch, K. and Krogh, A. (1904). Über einen in biologischer Beziehung wichtigen Einfluss, den die Kohlensäurespannung des Blutes auf dessen Sauerstoffbindung übt. *Skand. Arch. f. Physiol.* **16**, 402–412.
- Brander, K.M. (ed.) (2005). Spawning and life history information for North Atlantic cod stocks. ICES Cooperative Research Report 274, 152pp. ICES: Copenhagen.
- Brix, O., Forås, E. and Strand, I. (1998). Genetic variation and functional properties of Atlantic cod hemoglobins: introducing a modified tonometric method for studying fragile hemoglobins. *Comp. Biochem. Physiol. A Mol. Integr. Physiol.* **119**, 575–583.
- Brix, O., Thorkildsen, S. and Colosimo, A. (2004). Temperature acclimation modulates the oxygen binding properties of the Atlantic cod (*Gadus morhua* L.) genotypes—Hb1\*1/1, Hb1\*1/2, and Hb1\*2/2—by changing the concentrations of their major hemoglobin components (results from growth studies at different temperatures). *Comp. Biochem. Physiol. A Mol. Integr. Physiol.* **138**, 241–251.
- Claireaux, G. and Dutil, J. D. (1992). Physiological response of the Atlantic cod (*Gadus morhua*) to hypoxia at various environmental salinities. *J. Exp. Biol.* **163**, 97–118.
- Clark, T. D., Rummer, J. L., Sepulveda, C. A., Farrell, A. P. and Brauner, C. J. (2010). Reduced and reversed temperature dependence of blood oxygenation in an ectothermic scomid fish: implications for the evolution of regional heterothermy? *J. Comp. Physiol. B* **180**, 73–82.
- Colosimo, A., Giuliani, A., Maranghi, F., Brix, O., Thorkildsen, S., Fischer, T., Knust, R. and Pörtner, H. O. (2003). Physiological and genetical adaptation to temperature in fish populations. *Cont. Shelf Res.* **23**, 1919–1928.
- Dejours, P. (1975). *Principles of Comparative Respiratory Physiology: North*. Amsterdam, New York: Holl. Publ. Comp.
- Deutsch, C., Ferrel, A., Seibel, B., Pörtner, H.-O. and Huey, R. B. (2015). Climate change tightens a metabolic constraint on marine habitats. *Science* **348**, 1132–1135.
- Drinkwater, K. F. (2005). The response of Atlantic cod (*Gadus morhua*) to future climate change. *ICES J. Mar. Sci.* **62**, 1327–1337.
- Ekelund, L. G. and Holmgren, A. (1964). Circulatory and respiratory adaptation, during long-term, non-steady state exercise, in sitting position. *Acta Physiol. Scand.* **62**, 240–255.
- Engelhard, G. H., Righton, D. A. and Pinnegar, J. K. (2014). Climate change and fishing: a century of shifting distribution in North Sea cod. *Global Change Biol.* **20**, 2473–2483.
- Farrell, A., Farrell, N., Jourdan, H. and Cox, G. (2012). A perspective on the evolution of the coronary circulation in fishes and the transition to terrestrial life. In *Ontogeny and Phylogeny of the Vertebrate Heart* (ed. D. Sedmera and T. Wang), pp. 75–102. New York: Springer.
- Fick, A. (1870). Ueber die Messung des Blutquantums in den Herzventrikeln. *Sitzber. Physik. Med. Ges. Würzburg* **2**, 16.
- Freitas, C., Olsen, E. M., Moland, E., Ciannelli, L. and Knutsen, H. (2015). Behavioral responses of Atlantic cod to sea temperature changes. *Ecol. Evol.* **5**, 2070–2083.
- Gamperl, A. K., Busby, C. D., Hori, T. S. F., Afonso, L. O. B. and Hall, J. R. (2009). Hemoglobin genotype has minimal influence on the physiological response of juvenile Atlantic cod (*Gadus morhua*) to environmental challenges. *Physiol. Biochem. Zool.* **82**, 483–494.
- Gollock, M. J., Currie, S., Petersen, L. H. and Gamperl, A. K. (2006). Cardiovascular and haematological responses of Atlantic cod (*Gadus morhua*) to acute temperature increase. *J. Exp. Biol.* **209**, 2961–2970.
- Herbert, N. A., Skov, P. V., Wells, R. M. G. and Steffensen, J. F. (2006). Whole blood–oxygen binding properties of four cold-temperate marine fishes: blood affinity is independent of pH-dependent binding, routine swimming performance, and environmental hypoxia. *Physiol. Biochem. Zool.* **79**, 909–918.
- IPCC (2014). Summary for policymakers. In *Climate Change 2014: Impacts, Adaptation, and Vulnerability. Part A: Global and Sectoral Aspects Contribution of Working Group II to the Fifth Assessment Report of the Intergovernmental Panel on Climate Change* (ed. Field, C. B., Barros, V. R., Dokken, D. J., Mach, K. J., Mastrandrea, M. D., Bilir, T. E., Chatterjee, M., Ebi, K. L., Estrada, Y. O., Genova, R. C., et al.), pp. 1–32. Cambridge: Cambridge University Press.
- Jamieson, A. and Birley, A. J. (1989). The demography of a haemoglobin polymorphism in the Atlantic cod, *Gadus morhua* L. *J. Fish Biol.* **35**, 193–204.
- Karlsson, A., Heier, L. S., Rosseland, B. O., Salbu, B. and Kiessling, A. (2011). Changes in arterial PO<sub>2</sub>, physiological blood parameters and intracellular antioxidants in free-swimming Atlantic cod (*Gadus morhua*) exposed to varying levels of hyperoxia. *Fish Physiol. Biochem.* **37**, 249–258.
- Karpov, A. and Novikov, G. (1980). Hemoglobin alloforms in cod, *Gadus morhua* (Gadiformes, Gadidae), their functional characteristics and occurrence in populations. *J. Ichthyol.* **20**, 45–50.
- Kinkead, R., Fritsche, R., Perry, S. F. and Nilsson, S. (1991). The role of circulating catecholamines in the ventilatory and hypertensive responses to hypoxia in the Atlantic cod (*Gadus morhua*). *Physiol. Zool.* **1087**–1109.
- Koldkjaer, P. and Berenbrink, M. (2007). In vivo red blood cell sickling and mechanism of recovery in whiting, *Merlangius merlangus*. *J. Exp. Biol.* **210**, 3451–3460.
- Kreiss, C. M., Michael, K., Lucassen, M., Jutfelt, F., Motyka, R., Dupont, S. and Pörtner, H. (2015). Ocean warming and acidification modulate energy budget and gill ion regulatory mechanisms in Atlantic cod (*Gadus morhua*). *J. Comp. Physiol. B* **185**, 767–781.
- Krogh, A. and Leitch, I. (1919). The respiratory function of the blood in fishes. *J. Physiol.* **52**, 288–300.
- Lannig, G., Bock, C., Sartoris, F. J. and Pörtner, H.-O. (2004). Oxygen limitation of thermal tolerance in cod, *Gadus morhua* L., studied by magnetic resonance imaging and on-line venous oxygen monitoring. *Am. J. Physiol. Regul. Integr. Comp. Physiol.* **287**, R902–R910.
- Larsen, B., Pörtner, H.-O. and Jensen, F. (1997). Extra- and intracellular acid-base balance and ionic regulation in cod (*Gadus morhua*) during combined and isolated exposures to hypercapnia and copper. *Mar. Biol.* **128**, 337–346.
- Leray, C. (1982). Patterns of purine nucleotides in some North Sea fish erythrocytes. *Comp. Biochem. Physiol. B Comp. Biochem.* **71**, 77–81.
- Mork, J. and Sundnes, G. (1984). Haemoglobin polymorphism in *Gadus morhua*: genotypic differences in haematocrit. *Helgoländer Meeresun.* **38**, 201–206.
- Mork, J. A., Giskeødegård, R. and Sundnes, G. (1984). The haemoglobin polymorphism in Atlantic cod (*Gadus morhua* L.); genotypic differences in somatic growth and in maturing age in natural populations. In *The propagation of cod Gadus morhua L.: An International Symposium*, pp. 14–17. Arendal, June 1983.
- Neat, F. C., Bendall, V., Berx, B., Wright, P. J., Ó Cuaig, M., Townhill, B., Schön, P., Lee, J. and Righton, D. (2014). Movement of Atlantic cod around the British Isles: implications for finer scale stock management. *J. Appl. Ecol.* **51**, 1564–1574.
- Nelson, J., Tang, Y. and Boutilier, R. (1996). The effects of salinity change on the exercise performance of two Atlantic cod (*Gadus morhua*) populations inhabiting different environments. *J. Exp. Biol.* **199**, 1295–1309.
- O'Boyle, S. and Nolan, G. (2010). The influence of water column stratification on dissolved oxygen levels in coastal and shelf waters around Ireland. *Proc. R. Ir. Acad. Biology and Environment* **110B**, 195–209.
- Perry, S. F., Fritsche, R., Kinkead, R. and Nilsson, S. (1991). Control of catecholamine release in vivo and in situ in the Atlantic cod (*Gadus morhua*) during hypoxia. *J. Exp. Biol.* **155**, 549–566.
- Perry, A. L., Low, P. J., Ellis, J. R. and Reynolds, J. D. (2005). Climate change and distribution shifts in marine fishes. *Science* **308**, 1912–1915.
- Petersen, L. H. and Gamperl, A. K. (2011). Cod (*Gadus morhua*) cardiorespiratory physiology and hypoxia tolerance following acclimation to low-oxygen conditions. *Physiol. Biochem. Zool.* **84**, 18–31.
- Petersen, M. F. and Steffensen, J. F. (2003). Preferred temperature of juvenile Atlantic cod *Gadus morhua* with different haemoglobin genotypes at normoxia and moderate hypoxia. *J. Exp. Biol.* **206**, 359–364.

- Pörtner, H. O.** (2001). Climate change and temperature-dependent biogeography: oxygen limitation of thermal tolerance in animals. *Naturwissenschaften* **88**, 137–146.
- Pörtner, H. O. and Knust, R.** (2007). Climate change affects marine fishes through the oxygen limitation of thermal tolerance. *Science* **315**, 95–97.
- Pörtner, H. O., Berdal, B., Blust, R., Brix, O., Colosimo, A., De Wachter, B., Giuliani, A., Johansen, T., Fischer, T. and Knust, R.** (2001). Climate induced temperature effects on growth performance, fecundity and recruitment in marine fish: developing a hypothesis for cause and effect relationships in Atlantic cod (*Gadus morhua*) and common eelpout (*Zoarces viviparus*). *Cont. Shelf Res.* **21**, 1975–1997.
- Righton, D. and Metcalfe, J.** (2002). Multi-torsking: simultaneous measurements of cod behaviour show differences between North Sea and Irish Sea stocks. In *Aquatic Telemetry* (ed. E. B. Thorstad, I. A. Fleming and T. F. Naesje), pp. 193–200. Berlin: Springer.
- Righton, D., Metcalfe, J. and Connolly, P.** (2001). Fisheries: different behaviour of North and Irish Sea cod. *Nature* **411**, 156–156.
- Righton, D., Andersen, K. H., Neat, F., Thorsteinsson, V., Steingrund, P., Svedäng, H., Michalsen, K., Hinrichsen, H., Bendall, V. and Neuenfeldt, S.** (2010). Thermal niche of Atlantic cod *Gadus morhua*: limits, tolerance and optima. *Mar. Ecol. Prog. Ser.* **420**, 1–13.
- Ross, S. D., Behrens, J. W., Brander, K., Methling, C. and Mork, J.** (2013). Haemoglobin genotypes in cod (*Gadus morhua* L): their geographic distribution and physiological significance. *Comp. Biochem. Physiol. A Mol. Integr. Physiol.* **166**, 158–168.
- Rummer, J. L., McKenzie, D. J., Innocenti, A., Supuran, C. T. and Brauner, C. J.** (2013). Root effect hemoglobin may have evolved to enhance general tissue oxygen delivery. *Science* **340**, 1327–1329.
- Rutterford, L. A., Simpson, S. D., Jennings, S., Johnson, M. P., Blanchard, J. L., Schön, P., Sims, D. W., Tinker, J. and Genner, M. J.** (2015). Future fish distributions constrained by depth in warming seas. *Nat. Clim. Change* **5**, 569–573.
- Saffran, W. A. and Gibson, Q. H.** (1979). The effect of temperature on carbon monoxide binding to a root effect hemoglobin. *J. Biol. Chem.* **254**, 1666–1670.
- Santer, R. and Walker, M. G.** (1980). Morphological studies on the ventricle of teleost and elasmobranch hearts. *J. Zool.* **190**, 259–272.
- Sartoris, F., Bock, C., Serendero, I., Lannig, G. and Pörtner, H.** (2003). Temperature-dependent changes in energy metabolism, intracellular pH and blood oxygen tension in the Atlantic cod. *J. Fish Biol.* **62**, 1239–1253.
- Sick, K.** (1961). Haemoglobin polymorphism in fishes. *Nature* **192**, 894–896.
- Sick, K.** (1965). Haemoglobin polymorphism of cod in the North Sea and the North Atlantic Ocean. *Hereditas* **54**, 49–69.
- Star, B., Nederbragt, A. J., Jentoft, S., Grimholt, U., Malmstrøm, M., Gregers, T. F., Rounge, T. B., Paulsen, J., Solbakken, M. H. and Sharma, A.** (2011). The genome sequence of Atlantic cod reveals a unique immune system. *Nature* **477**, 207–210.
- Ultsch, G. R. and Jackson, D. C.** (1996). pH and temperature in ectothermic vertebrates. *Bull. Alabam Mus. Nat. Hist.* **18**, 1–41.
- Verde, C., Balestrieri, M., de Pascale, D., Pagnozzi, D., Lecointre, G. and di Prisco, G.** (2006). The oxygen transport system in three species of the boreal fish family Gadidae. Molecular phylogeny of hemoglobin. *J. Biol. Chem.* **281**, 22073–22084.
- Völkel, S. and Berenbrink, M.** (2000). Sulphaemoglobin formation in fish: a comparison between the haemoglobin of the sulphide-sensitive rainbow trout (*Oncorhynchus mykiss*) and of the sulphide-tolerant common carp (*Cyprinus carpio*). *J. Exp. Biol.* **203**, 1047–1058.
- Weber, R. E. and Campbell, K. L.** (2011). Temperature dependence of haemoglobin–oxygen affinity in heterothermic vertebrates: mechanisms and biological significance. *Acta Physiol.* **202**, 549–562.
- Weber, R. E. and Jensen, F. B.** (1988). Functional adaptations in hemoglobins from ectothermic vertebrates. *Annu. Rev. Physiol.* **50**, 161–179.
- Weber, R. E., Campbell, K. L., Fago, A., Malte, H. and Jensen, F. B.** (2010). ATP-induced temperature independence of hemoglobin–O<sub>2</sub> affinity in heterothermic billfish. *J. Exp. Biol.* **213**, 1579–1585.
- Wetten, O. F., Nederbragt, A. J., Wilson, R. C., Jakobsen, K. S., Edvardsen, R. B. and Andersen, O.** (2010). Genomic organization and gene expression of the multiple globins in Atlantic cod: conservation of globin-flanking genes in chordates infers the origin of the vertebrate globin clusters. *BMC Evol. Biol.* **10**, 315.
- Wittenberg, J. B. and Wittenberg, B. A.** (1962). Active secretion of oxygen into the eye of fish. *Nature* **194**, 106–107.
